# Supplementary material for: A Food Waste-Derived Organic Liquid Fertiliser for Sustainable Hydroponic Cultivation of Lettuce, Cucumber and Cherry Tomato
Source: MDPI journal article supplement (doi:10.3390/foods12040719), 2023-02-07
Supplement: s1 [file s1]

Supplementary Data

**Table S1.** Nutrients (N and P) concentrations in lettuce, cucumber and tomato, grown using FoodLift and CLF.

| Plant    | Type     | Component | Average macro-nutrients concentration on dry weight basis, g/kg |            |
|----------|----------|-----------|-----------------------------------------------------------------|------------|
|          |          |           | N (SD)                                                          | P (SD)     |
| Lettuce  | CLF      | Leaves    | 258.3 (39.6)                                                    | 86 (8.5)   |
|          |          | Roots     | 251.3 (29.7)                                                    | 88 (5.6)   |
|          |          | Stem      | 53 (4)                                                          | 11.2 (2.6) |
|          |          | Stalk     | 223.3 (2.1)                                                     | 88.2 (1.9) |
|          | FoodLift | Leaves    | 250 (29.5)                                                      | 87 (1.6)   |
|          |          | Roots     | 261.3 (22.5)                                                    | 87 (1.7)   |
|          |          | Stem      | 54 (13)                                                         | 12.9 (0.2) |
|          |          | Stalk     | 241.7 (22)                                                      | 86.7 (5.1) |
| Cucumber | CLF      | Fruit     | 27 (7)                                                          | 6.9 (5.3)  |
|          |          | Leaves    | 35 (6)                                                          | 32.7 (3.1) |
|          |          | Roots     | 35 (6.6)                                                        | 10 (1)     |
|          |          | Stem      | 32 (5.3)                                                        | 8.9 (2)    |
|          |          | Stalk     | 30.3 (2.5)                                                      | 8.3 (0.6)  |
|          | FoodLift | Fruit     | 28 (4)                                                          | 10 (0.9)   |
|          |          | Leaves    | 34 (4)                                                          | 30.7 (3.2) |
|          |          | Roots     | 35 (1.5)                                                        | 9.8 (0.3)  |
|          |          | Stem      | 33 (6.6)                                                        | 10 (0.9)   |
|          |          | Stalk     | 31 (1)                                                          | 6.9 (1)    |
| Tomato   | CLF      | Fruit     | 3 (0.4)                                                         | 32.3 (1.5) |
|          |          | Leaves    | 1 (0.5)                                                         | 4 (0.5)    |
|          |          | Roots     | 18.3 (2.5)                                                      | 6.3 (0.6)  |
|          |          | Stem      | 5.2 (0.8)                                                       | 3.9 (0.3)  |
|          |          | Stalk     | 7 (1.1)                                                         | 4.7 (1.2)  |
|          | FoodLift | Fruit     | 3.1 (0.4)                                                       | 31 (1)     |
|          |          | Leaves    | 1 (0.4)                                                         | 4.8 (0.3)  |
|          |          | Roots     | 36 (1)                                                          | 5.9 (0.1)  |
|          |          | Stem      | 3 (0.7)                                                         | 3.9 (0.9)  |
|          |          | Stalk     | 9.4 (1.4)                                                       | 4.8 (0.7)  |

Note: Standard deviation (SD) values are given in parenthesis.

**Table S2.** Cations concentrations in lettuce, cucumber and cherry tomato, grown using FoodLift and CLF.

| Plant    | Type     | Component | Average cations concentration on dry weight basis, g/kg |            |            |
|----------|----------|-----------|---------------------------------------------------------|------------|------------|
|          |          |           | Ca (SD)                                                 | K (SD)     | Mg (SD)    |
| Lettuce  | CLF      | Leaves    | 5.2 (1)                                                 | 14.3 (1.3) | 1 (0.2)    |
|          |          | Roots     | 8.1 (0.8)                                               | 7.5 (0.5)  | 36.7 (2.1) |
|          |          | Stem      | 4.3 (0.3)                                               | 4.1 (0.6)  | 1.9 (0.3)  |
|          |          | Stalk     | 3.3 (0.6)                                               | 3 (0.6)    | 0.8 (0.1)  |
|          | FoodLift | Leaves    | 7 (0.2)                                                 | 7 (1)      | 3.1 (0.7)  |
|          |          | Roots     | 5.9 (0.5)                                               | 6.9 (0.7)  | 22 (1)     |
|          |          | Stem      | 3 (0.2)                                                 | 13 (1)     | 0.8 (0.1)  |
|          |          | Stalk     | 4.3 (0.3)                                               | 20 (1)     | 2 (0.2)    |
| Cucumber | CLF      | Fruit     | 1.9 (0.2)                                               | 17.1 (1.4) | 1.9 (0.3)  |
|          |          | Leaves    | 18 (1)                                                  | 14.4 (2.7) | 7 (0.2)    |
|          |          | Roots     | 28.4 (3.5)                                              | 55.1 (3.5) | 7 (1.0)    |
|          |          | Stem      | 8 (1)                                                   | 16.4 (1.8) | 3 (0.2)    |
|          |          | Stalk     | 6.4 (0.7)                                               | 18 (1)     | 3 (0.6)    |
|          | FoodLift | Fruit     | 17.8 (1.3)                                              | 20.7 (2.5) | 12 (1)     |
|          |          | Leaves    | 2 (0.2)                                                 | 17 (1)     | 2 (0.2)    |
|          |          | Roots     | 3 (0.2)                                                 | 30.7 (3.8) | 3 (0.2)    |
|          |          | Stem      | 8 (1)                                                   | 12 (1)     | 18.8 (2.9) |
|          |          | Stalk     | 6.2 (0.9)                                               | 28.7 (5.7) | 3 (0.2)    |
| Tomato   | CLF      | Fruit     | 3.1 (0.7)                                               | 17.7 (1.2) | 2 (0.2)    |
|          |          | Leaves    | 1 (0.2)                                                 | 13 (1)     | 1 (0.2)    |
|          |          | Roots     | 18 (1)                                                  | 20 (1)     | 8 (1)      |
|          |          | Stem      | 5.4 (0.6)                                               | 2.4 (0.4)  | 4.3 (0.3)  |
|          |          | Stalk     | 7.2 (0.8)                                               | 37 (1)     | 3.4 (0.5)  |
|          | FoodLift | Fruit     | 3.4 (0.5)                                               | 4 (1)      | 1.1 (0.1)  |
|          |          | Leaves    | 1.1 (0.1)                                               | 21.3 (5)   | 14.4 (2.7) |
|          |          | Roots     | 35.7 (1.5)                                              | 29.5 (1.7) | 2 (0.2)    |
|          |          | Stem      | 3.1 (0.4)                                               | 54.2 (2.4) | 14.4 (2.7) |
|          |          | Stalk     | 9 (0.2)                                                 | 12 (1)     | 1.9 (0.2)  |

Note: Standard deviation (SD) values are given in parenthesis.
